# Supplementary material for: Impact of chloride and strong ion difference on ICU and hospital mortality in a mixed intensive care population
Source: PubMed Central journal article supplement (PMC5026977; doi:10.1186/s13613-016-0193-x), 2016-09-17
Supplement: 13613_2016_193_MOESM1_ESM.pdf [file 13613_2016_193_MOESM1_ESM.pdf]

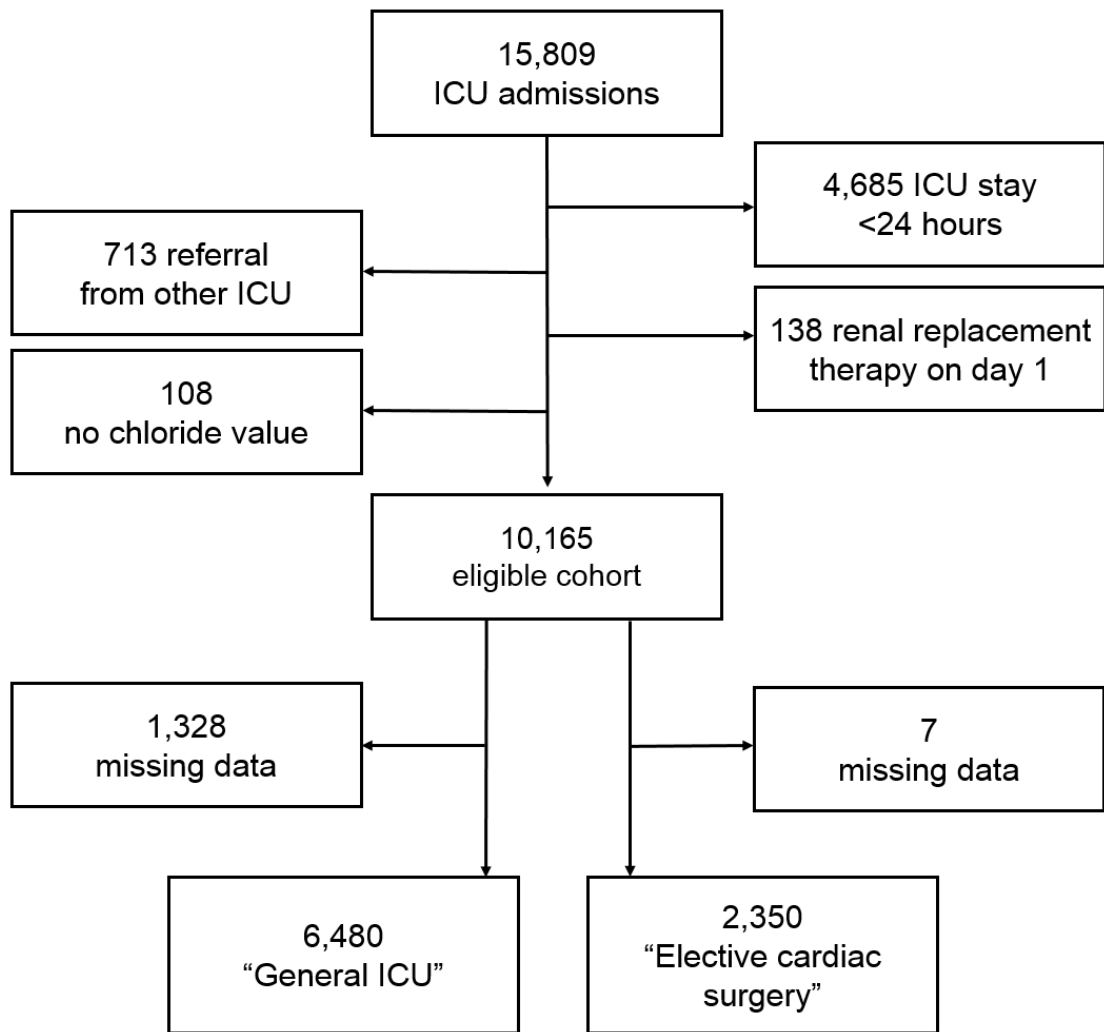

Figure S1: Cohort derivation, exclusion criteria and missing values. ICU = intensive care unit.
