# Supplementary material for: Impact of chloride and strong ion difference on ICU and hospital mortality in a mixed intensive care population
Source: PubMed Central journal article supplement (PMC5026977; doi:10.1186/s13613-016-0193-x), 2016-09-17
Supplement: 13613_2016_193_MOESM2_ESM.pdf [file 13613_2016_193_MOESM2_ESM.pdf]

| Medical             |       |       | Surgical            |              |              |       |                  |
|---------------------|-------|-------|---------------------|--------------|--------------|-------|------------------|
|                     |       |       |                     |              | Elective     |       | Emergency/Trauma |
| Diagnostic category | n     | (%)   | Diagnostic category | n            | %            | n     | %                |
| Hemodynamic         | 1,210 | 35.5% | Abdominal           | 180          | 4.0%         | 249   | 11.8%            |
| Hemorrhage          | 259   | 7.4%  | Hepatic/Pancreatic  | 405          | 8.9%         | 91    | 4.3%             |
| Respiratory         | 457   | 13%   | <b>Cardiac</b>      | <b>2,357</b> | <b>51.8%</b> | 352   | 16.7%            |
| Gastrointestinal    | 60    | 1.7%  | Intracranial        | 496          | 10.9%        | 402   | 19.1%            |
| Hepatic             | 121   | 3.5%  | Thoracic            | 686          | 15.1%        | 69    | 3.3%             |
| Sepsis              | 709   | 20.2% | Vascular            | 164          | 3.6%         | 325   | 15.4%            |
| Neurological        | 384   | 11.0% | Trauma              | 0            | 0.0%         | 415   | 19.7%            |
| Other               | 305   | 8.7%  | Other               | 263          | 5.8%         | 206   | 9.8%             |
| Total               | 3,505 | 100%  | Total               | 4,551        | 100,0%       | 2,109 | 100,0%           |

Table S2: Admission type and admission reason categories
