# Supplementary material for: Impact of chloride and strong ion difference on ICU and hospital mortality in a mixed intensive care population
Source: PubMed Central journal article supplement (PMC5026977; doi:10.1186/s13613-016-0193-x), 2016-09-17
Supplement: 13613_2016_193_MOESM3_ESM.pdf [file 13613_2016_193_MOESM3_ESM.pdf]

| POC-DATA                | Outcome: 30-day mortality <sup>1</sup> (n=6,465) |           |                                           |                                        | Outcome: hospital mortality <sup>2</sup> (n=5,173) |           |                                           |                                        |         |
|-------------------------|--------------------------------------------------|-----------|-------------------------------------------|----------------------------------------|----------------------------------------------------|-----------|-------------------------------------------|----------------------------------------|---------|
|                         | Chloride category                                | n         | % outcome                                 | Odds ratio (95% CI) vs. normochloremia | p-value                                            | n         | % outcome                                 | Odds ratio (95% CI) vs. normochloremia | p-value |
| Normochloremia          | 2.372                                            | 9.4%      |                                           |                                        | 1.879                                              | 24.6%     |                                           |                                        |         |
| Hypochloremia           | 311                                              | 11.9%     | 1.03 (0.69-1.60)                          | 0.88                                   | 242                                                | 37.6%     | 1.24 (0.88-1.75)                          | 0.22                                   |         |
| Moderate hyperchloremia | 1.586                                            | 9.5%      | 1.27 (0.97-1.66)                          | 0.08                                   | 1.297                                              | 20.5%     | 1.09 (0.87-1.36)                          | 0.46                                   |         |
| Severe hyperchloremia   | 2.196                                            | 13.7%     | 1.58 (1.61-2.13)                          | 0.003                                  | 1.755                                              | 27.0%     | 1.43 (1.10-1.85)                          | 0.007                                  |         |
| SIDa category           | n                                                | % outcome | Odds ratio (95% CI) vs. intermediate SIDa | p-value                                | n                                                  | % outcome | Odds ratio (95% CI) vs. intermediate SIDa | p-value                                |         |
| Intermediate SIDa       | 2.747                                            | 10.3%     |                                           |                                        | 2.210                                              | 22.1%     |                                           |                                        |         |
| Low SIDa                | 1.497                                            | 12.8%     | 1.02 (0.79-1.32)                          | 0.87                                   | 1.164                                              | 26.5%     | 0.92 (0.74-1.15)                          | 0.45                                   |         |
| High SIDa               | 2.221                                            | 10.7%     | 1.10 (0.85-1.41)                          | 0.47                                   | 1.799                                              | 27.7%     | 1.36 (1.10-1.68)                          | 0.004                                  |         |
| Sodium category         | n                                                | % outcome | Odds ratio (95% CI) vs. normal sodium     | p-value                                | n                                                  | % outcome | Odds ratio (95% CI) vs. normal sodium     | p-value                                |         |
| Normal sodium           | 4.312                                            | 9.9%      |                                           |                                        | 3.497                                              | 22.6%     |                                           |                                        |         |
| Hyponatremia            | 1.815                                            | 11.7%     | 1.28 (0.99-1.67)                          | 0.06                                   | 1.395                                              | 28.0%     | 1.28 (1.03-1.58)                          | 0.02                                   |         |
| Hypernatremia           | 338                                              | 21.9%     | 1.21 (0.84-1.73)                          | 0.31                                   | 281                                                | 40.6%     | 1.04 (0.75-1.44)                          | 0.81                                   |         |
|                         |                                                  |           | Area under ROC 86.6%                      |                                        |                                                    |           |                                           | Area under ROC 83.4%                   |         |
|                         |                                                  |           | Maximal VIF 2.70                          |                                        |                                                    |           |                                           | Maximal VIF 2.72                       |         |
|                         |                                                  |           | Tolerance 0.67                            |                                        |                                                    |           |                                           | Tolerance 0.67                         |         |

Table S3: Logistic regression models in the **general ICU population** excluding patients admitted after elective cardiac surgery. Point-of-care data for chloride and sodium were used as covariates and for the calculation of SIDa.

<sup>1</sup> Confounders adjusted for in the model: SAPS-3, admission reason, RIFLEcrea\*, RIFLEurine, lactate, heart failure\*, COPD\*, pCO<sub>2</sub>\* (low, normal, high), albumin, SIG, potentiometry type\* (\* = p > 0.05).

<sup>2</sup> Confounders adjusted for in the model: SAPS-3, admission reason, RIFLEcrea, RIFLEurine, lactate, heart failure, COPD, pCO<sub>2</sub>\* (low, normal, high), albumin, SIG\*, potentiometry type (\* = p > 0.05).

SIDa = apparent strong ion difference (excl. lactate); ROC = Receiver under Operating Characteristics Curve; VIF = variance inflation factor
