# Supplementary material for: Impact of chloride and strong ion difference on ICU and hospital mortality in a mixed intensive care population
Source: PubMed Central journal article supplement (PMC5026977; doi:10.1186/s13613-016-0193-x), 2016-09-17
Supplement: 13613_2016_193_MOESM4_ESM.pdf [file 13613_2016_193_MOESM4_ESM.pdf]

| POC-data                | Outcome: 30-day mortality <sup>1</sup> (n=2,342) |           |                                       |                                        | Outcome: hospital mortality <sup>2</sup> (n=2,149) |           |                                       |                                        |
|-------------------------|--------------------------------------------------|-----------|---------------------------------------|----------------------------------------|----------------------------------------------------|-----------|---------------------------------------|----------------------------------------|
|                         | Chloride category                                | n         | % outcome                             | Odds ratio (95% CI) vs. normochloremia | p-value                                            | n         | % outcome                             | Odds ratio (95% CI) vs. normochloremia |
| Normochloremia          | 110                                              | 6.4%      |                                       |                                        | 93                                                 | 15.1%     |                                       |                                        |
| Hypochloremia           | 12                                               | 33.3%     | 10.85 (1.56-75.48)                    | 0.016                                  | 7                                                  | 71.4%     | 24.03 (3.00-192.12)                   | 0.003                                  |
| Moderate hyperchloremia | 238                                              | 2.9%      | 0.86 (0.23-3.29)                      | 0.83                                   | 218                                                | 6.0%      | 0.68 (0.26-1.82)                      | 0.45                                   |
| Severe hyperchloremia   | 1,982                                            | 3.0%      | 0.90 (0.26-3.14)                      | 0.87                                   | 1,831                                              | 5.2%      | 0.52 (0.21-1.32)                      | 0.17                                   |
| SIDa category           | n                                                | % outcome | Odds ratio (95% CI) vs. mean SID      | p-value                                | n                                                  | % outcome | Odds ratio (95% CI) vs. mean SID      | p-value                                |
| Intermediate SIDa       | 1,005                                            | 3.4%      |                                       |                                        | 931                                                | 6.0%      |                                       |                                        |
| Low SIDa                | 1,138                                            | 2.1%      | 0.82 (0.43-1.56)                      | 0.54                                   | 1,045                                              | 4.5%      | 0.98 (0.59-1.61)                      | 0.92                                   |
| High SIDa               | 199                                              | 10.1%     | 0.82 (0.36-1.89)                      | 0.64                                   | 173                                                | 13.9%     | 0.67 (0.32-1.37)                      | 0.27                                   |
| Sodium category         | n                                                | % outcome | Odds ratio (95% CI) vs. normal sodium | p-value                                | n                                                  | % outcome | Odds ratio (95% CI) vs. normal sodium | p-value                                |
| Normal sodium           | 2,035                                            | 2.5%      |                                       |                                        | 1,869                                              | 4.7%      |                                       |                                        |
| Hyponatremia            | 198                                              | 5.6%      | 1.14 (0.42-3.10)                      | 0.80                                   | 175                                                | 11.4%     | 1.22 (0.59-2.51)                      | 0.60                                   |
| Hypernatremia           | 109                                              | 14.7%     | 1.85 (0.77-4.49)                      | 0.17                                   | 105                                                | 18.1%     | 1.94 (0.90-4.15)                      | 0.09                                   |
|                         |                                                  |           |                                       | Area under ROC 87.9%                   |                                                    |           |                                       |                                        |
|                         |                                                  |           |                                       | Maximal VIF 4.47                       |                                                    |           |                                       |                                        |
|                         |                                                  |           |                                       | Tolerance 0.66                         |                                                    |           |                                       |                                        |
|                         |                                                  |           |                                       |                                        | Area under ROC 83.3%                               |           |                                       |                                        |
|                         |                                                  |           |                                       |                                        | Maximal VIF 4.48                                   |           |                                       |                                        |
|                         |                                                  |           |                                       |                                        | Tolerance 0.66                                     |           |                                       |                                        |

Table S4: Logistic regression models on the subgroup admitted after **elective cardiac surgery**. Point-of-care data for chloride and sodium were used as covariates and for the calculation of SIDa.

<sup>1</sup> Confounders adjusted for in the model: SAPS-3, RIFLEcrea, lactate, heart failure\*, COPD\*, pCO<sub>2</sub>\* (low, normal, high), albumin\*, SIG, potentiometry type\* (\* = p > 0.05). RIFLEurine omitted because of collinearity.

<sup>2</sup> Confounders adjusted for in the model: SAPS-3, RIFLEcrea, lactate, heart failure, COPD, pCO<sub>2</sub>\* (low, normal, high), albumin\*, SIG, potentiometry type\* (\* = p > 0.05). RIFLEurine omitted because of collinearity.

SIDa = apparent strong ion difference (excl. lactate); ROC = Receiver under Operating Characteristics Curve; VIF = variance inflation factor
