# Supplementary material for: Impact of chloride and strong ion difference on ICU and hospital mortality in a mixed intensive care population
Source: PubMed Central journal article supplement (PMC5026977; doi:10.1186/s13613-016-0193-x), 2016-09-17
Supplement: 13613_2016_193_MOESM5_ESM.pdf [file 13613_2016_193_MOESM5_ESM.pdf]

| Highest Chloride D1 & 2<br>Lowest SIDa D1 & 2 | Outcome: 30-day mortality <sup>1</sup> (n=6,480) |           |                                              |         | Outcome: hospital mortality <sup>2</sup> (n=5,176) |           |                                              |                      |  |
|-----------------------------------------------|--------------------------------------------------|-----------|----------------------------------------------|---------|----------------------------------------------------|-----------|----------------------------------------------|----------------------|--|
| Chloride category                             | n                                                | % outcome | Odds ratio (95% CI)<br>vs. normochloremia    | p-value | n                                                  | % outcome | Odds ratio (95% CI)<br>vs. normochloremia    | p-value              |  |
| Normochloremia                                | 3.087                                            | 9.9%      |                                              |         | 2.439                                              | 24.7%     |                                              |                      |  |
| Hypochloremia                                 | 250                                              | 18.8%     | 1.52 (0.99-2.35)                             | 0.06    | 190                                                | 50.5%     | 2.21 (1.51-3.24)                             | <0.001               |  |
| Moderate hyperchloremia                       | 1.570                                            | 8.7%      | 1.14 (0.87-1.48)                             | 0.35    | 1.285                                              | 18.7%     | 0.91 (0.74-1.14)                             | 0.42                 |  |
| Severe hyperchloremia                         | 1.573                                            | 14.3%     | 1.67 (1.24-2.24)                             | 0.001   | 1.262                                              | 28.1%     | 1.32 (1.03-1.68)                             | 0.03                 |  |
| SIDa category                                 | n                                                | % outcome | Odds ratio (95% CI)<br>vs. intermediate SIDa | p-value | n                                                  | % outcome | Odds ratio (95% CI)<br>vs. intermediate SIDa | p-value              |  |
| Intermediate SIDa                             | 3.065                                            | 9.8%      |                                              |         | 2.459                                              | 21.2%     |                                              |                      |  |
| Low SIDa                                      | 2.011                                            | 9.8%      | 0.97 (0.76-1.24)                             | 0.81    | 1.587                                              | 21.7%     | 0.86 (0.80-1.20)                             | 0.86                 |  |
| High SIDa                                     | 1.404                                            | 15.5%     | 1.07 (0.83-1.37)                             | 0.60    | 1.130                                              | 38.0%     | 1.44 (1.17-1.76)                             | <0.001               |  |
| Sodium category                               | n                                                | % outcome | Odds ratio (95% CI)<br>vs. normal sodium     | p-value | n                                                  | % outcome | Odds ratio (95% CI)<br>vs. normal sodium     | p-value              |  |
| Normal sodium                                 | 4.921                                            | 9.4%      |                                              |         | 3.963                                              | 22.5%     |                                              |                      |  |
| Hyponatremia                                  | 1.009                                            | 13.0%     | 1.22 (0.92-1.61)                             | 0.17    | 761                                                | 29.2%     | 0.89 (0.70-1.23)                             | 0.32                 |  |
| Hypernatremia                                 | 550                                              | 21.8%     | 1.07 (0.75-1.48)                             | 0.68    | 452                                                | 39.8%     | 1.07 (0.80-1.42)                             | 0.67                 |  |
|                                               |                                                  |           | Area under ROC 86.7%                         |         |                                                    |           |                                              | Area under ROC 83.6% |  |
|                                               |                                                  |           | Maximal VIF 2.38                             |         |                                                    |           |                                              | Maximal VIF 2.40     |  |
|                                               |                                                  |           | Tolerance 0.68                               |         |                                                    |           |                                              | Tolerance 0.68       |  |

Table S5: Logistic regression models in the **total ICU population** excluding patients admitted after elective cardiac surgery. The highest chloride and the lowest SIDa encountered during the **first two days of admission** were used for analysis.

<sup>1</sup> Confounders adjusted for in the model: SAPS-3, admission reason, RIFLEcrea\*, RIFLEurine, lactate, heart failure\*, COPD\*, pCO<sub>2</sub>\* (low, normal, high), albumin, SIG, potentiometry type\* (\* = p > 0.05).

<sup>2</sup> Confounders adjusted for in the model: SAPS-3, admission reason, RIFLEcrea, RIFLEurine, lactate, heart failure, COPD, pCO<sub>2</sub>\* (low, normal, high), albumin, SIG\*, potentiometry type\* (\* = p > 0.05).

SIDa = apparent strong ion difference (excl. lactate); ROC = Receiver under Operating Characteristics Curve; VIF = variance inflation factor
